# Natural Image Statistics for Mouse Vision

**Authors:** Luca Abballe<sup>1</sup> and Hiroki Asari<sup>2\*</sup>

## **Affiliations:**

1. Department of Biomedical Engineering, Sapienza University of Rome, Rome RM, 00185, Italy

2. Epigenetics and Neurobiology Unit, EMBL Rome, European Molecular Biology Laboratory, Monterotondo RM, 00015, Italy

\***Corresponding author:** Hiroki Asari, E-mail: [asari@embl.it](mailto:asari@embl.it)

**Acknowledgments:** This work was supported by the European Molecular Biology Laboratory (H.A.). EMBL IT Support is acknowledged for provision of computer and data storage servers. We thank all the members of the Asari lab at EMBL Rome for many useful discussions.

**Author contributions:** L.A. collected and processed the image data sets. H.A. designed the study, analyzed the results, and wrote the manuscript.

**Competing interests:** The authors declare no competing financial interests.

## 15 **Abstract**

16 The mouse has dichromatic color vision based on two different types of opsins: short (S)- and  
17 middle (M)-wavelength-sensitive opsins with peak sensitivity to ultraviolet (UV; 360 nm) and  
18 green light (508 nm), respectively. In the mouse retina, cone photoreceptors that predominantly  
19 express the S-opsin are more sensitive to contrasts and denser towards the ventral retina,  
20 preferentially sampling the upper part of the visual field. In contrast, the expression of the  
21 M-opsin gradually increases towards the dorsal retina that encodes the lower visual field. Such  
22 a distinctive retinal organization is assumed to arise from a selective pressure in evolution to  
23 efficiently encode the natural scenes. However, natural image statistics of UV light remain  
24 largely unexplored. Here we developed a multi-spectral camera to acquire high-quality UV  
25 and green images of the same natural scenes, and examined the optimality of the mouse retina  
26 to the image statistics. We found that the local contrast and the spatial correlation were both  
27 higher in UV than in green for images above the horizon, but lower in UV than in green for  
28 those below the horizon. This suggests that the dorsoventral functional division of the mouse  
29 retina is not optimal for maximizing the bandwidth of information transmission. Factors besides  
30 the coding efficiency, such as visual behavioral requirements, will thus need to be considered to  
31 fully explain the characteristic organization of the mouse retina.

## 32 **Introduction**

33 Sensory systems have been considered to be adapted to the statistical properties of the  
34 environment through evolution [1]. Animals encounter different types of sensory signals  
35 depending on their natural habitats and lifestyles, and this can serve as an evolutionary driving  
36 force for each species to optimize its sensory systems for processing those signals that appear  
37 more frequently and are relevant for survival [2]. The optimality of the sensory processing has  
38 been broadly supported from an information theoretic viewpoint of coding efficiency [3, 4]. In  
39 particular, various physiological properties of sensory neurons can be successfully derived from  
40 learning efficient codes of natural images or natural sounds, such as separation of retinal outputs  
41 into ON and OFF channels [5], Gabor-like receptive fields of visual cortical neurons [6], and  
42 cochlear filter banks [7]. Such computational theories and statistical models are, however, often  
43 limited to generic features of the sensory processing, and fail to account for species-specific fine  
44 details partly due to a lack of proper data sets of natural sensory signals.

45 In the past decade, the mouse has become a dominant model for studying the visual  
46 system mainly because of the wide availability of experimental tools [8]. Compared to other  
47 mammalian model animals such as cats and primates, however, the mouse vision has certain  
48 distinctive properties. For example, mice are dichromats as many other mammals are, but  
49 their retina expresses ultraviolet (UV)-sensitive short (S)-wavelength sensitive opsins and  
50 green-sensitive middle (M)-wavelength sensitive opsins [9–11]. While UV vision is common  
51 in amphibians, birds and insects, it has not been identified in mammals except for a few  
52 species including rodents [12–14]. Moreover, the mouse retina has no fovea but a prominent  
53 dorsoventral gradient in the expression pattern of the two opsins [10, 15–17]. A vast majority  
54 of the mouse cone photoreceptors (~95%) co-express the two opsins but with a dominant  
55 expression of S- and M-opsins in the ventral and dorsal parts of the retina, respectively  
56 [9, 10, 18, 19]. This makes the upper visual field more sensitive to UV than green, and vice  
57 versa for the lower visual field [20]. It is natural to assume that this functional segregation of  
58 the mouse vision has evolved due to an adaptation to the natural light distribution as the sunlight  
59 is the major source of UV radiation. It remains unclear, though, how optimal the mouse visual  
60 system is to natural scene statistics *per se*.

61 While natural image statistics have been extensively studied thus far [1, 21], those outside  
62 the spectral domain of human vision remain to be fully explored [2, 18, 22–24]. Here we thus  
63 developed a multi-spectral camera system to sample high-quality images that spectrally match  
64 the mouse photopic vision, and analyzed the statistics of the UV and green image data sets to  
65 test the optimality of the sampling bias in the mouse retina along the dorsoventral axis [9, 10, 18,  
66 19]. We identified distinct statistical properties in the UV and green channels between the upper  
67 and lower visual field images; however, these image statistics were not necessarily consistent  
68 with what the efficient coding hypothesis would predict from the functional organization of the  
69 mouse retina.

## 70 **Materials and Methods**

71 All data and codes are available upon request.

### 72 **Multi-spectral camera**

#### 73 **Design**

74 We built a multi-spectral camera system based on a beam-splitting strategy [25, 26] to acquire  
75 images of the same scenes with ultraviolet (UV)- and green-transmitting channels that match  
76 the spectral sensitivity of the mouse photopic vision (Fig 1A) [9–11]. The light coming from  
77 a commercial camera lens (Nikon, AF Nikkor 50 mm f/1.8D) was collimated with a near-  
78 UV achromatic lens (effective focal length, 50 mm; Edmund Optics, 65-976) and split with  
79 a dichroic filter (409 nm; Edmund Optics, 34-725). The reflected light, on the one hand, passed  
80 through a UV-selective filter set (HOYA U-340 and short-pass filter at 550 nm; Edmund Optics,  
81 84-708) and formed the UV images focused on the first global-shutter camera (Imaging Source,  
82 DMK23UX174) with a near-UV achromatic lens (effective focal length, 50 mm; Edmund  
83 Optics, 65-976). The transmitted light, on the other hand, passed through a band-pass filter  
84 ( $500\pm 40$  nm; Edmund Optics, 65-743) and a lens (Edmund Optics, 65-976), and formed the  
85 green images sampled by the second camera (Imaging Source, DMK23UX174). To maximize

86 the dynamic range of the two camera sensors (used with the same settings), we attenuated  
87 the light intensity of the green channel using an absorptive neutral density (ND) filter (optical  
88 density: 1.0, 1.3, 1.5, 1.8, or 2.0) on a filter wheel (Thorlabs, LTFW6) because the sunlight has  
89 much higher power in green than in UV (Fig 1B). The optical components are all mounted with  
90 standard light-tight optomechanical components (Thorlabs, 1-inch diameter lens tubes).

91 A recent study employed a similar design but with a fisheye lens to study the “mouse-view”  
92 images [22]. Our design has the following advantages over a panoramic camera design [22–24]  
93 to sample high-quality image patches suitable for image statistics analysis. First, we chose a  
94 small field of view (11.3 degrees horizontally and 7.3 degrees vertically; 0.006 degrees/pixel)  
95 to minimize image distortion, and a large field of depth (the smallest aperture size on the  
96 Nikon lens,  $f/22$ ) to maximize areas in focus. This also allowed us to adjust camera settings  
97 (exposure length) to fully capture the dynamic range of individual scenes. Second, we chose a  
98 high-performance camera sensor (Sony, IMX174 complementary metal-oxide-semiconductor;  
99 CMOS) that has high quantum efficiency ( $\sim 30\%$  at 365 nm;  $\sim 75\%$  at 510 nm), high dynamic  
100 range (73 dB; 12 bit depth), high pixel resolution (1920-by-1200 pixels), and linear response  
101 dynamics (Fig 1A, inset) [27–29].

## 102 **Spectral analysis**

103 The spectral sensitivity of the multi-spectral camera system (Fig 1B) was calculated by  
104 convolving the relative transmission spectra of the optics for each channel with the spectral  
105 sensitivity of the camera sensor (Sony, IMX174 CMOS) [29]. The relative transmission spectra  
106 were measured with a spectrometer (Thorlabs, CCS200/M; 200–1000 nm range) by taking the  
107 ratio of the spectra of a clear sunny sky (indirect sunlight) with and without passing through the  
108 camera optics.

109 For a comparison, we modelled the spectral sensitivity of the mouse visual system by  
110 convolving the transmission spectra of the mouse eye [30] with the absorption spectra of the  
111 mouse cone photoreceptors (Fig 1B). We used a visual pigment template [31] with the center  
112 frequency at 360 nm and 508 nm to simulate the short (S)- and middle (M)-wavelength-sensitive  
113 opsins in the mouse retina, respectively [9–11].

## 114 **Image acquisition**

115 In total, we collected 232 images of natural scenes without any artificial object in the suburbs  
116 of Lazio/Abruzzo regions in Italy from July 2020 to May 2021. All the images were acquired  
117 using a custom-code in Matlab (Image Acquisition Toolbox) without any image correction, such  
118 as gain, contrast, or gamma adjustment. The two cameras were set with the same parameter  
119 values adjusted to each scene, such as the exposure length, and a proper ND filter was chosen  
120 for the green channel so that virtually all the pixels were within the dynamic range of the  
121 camera sensors (see examples in S2 Fig). Thus, our image data sets have no underexposed  
122 pixels and only a negligible number of overexposed pixels (0.0011% of pixels in 2 UV images  
123 and 0.0007% of pixels in 6 Green images). This is critical because the presence of under- or  
124 over-exposed pixels will skew the image statistics.

125 When acquiring images, the camera system was placed on the ground to follow the  
126 viewpoint of mice. The following meta-data were also recorded upon image acquisition: date,  
127 time, optical density of ND filter in the green channel, weather condition (sunny; cloudy),  
128 distance to target object (short, within a few meters; medium, within tens of meters; or  
129 long), presence/absence of specific objects (animals; plants; water), and camera elevation angle  
130 (looking up; horizontal; looking down). We also took a uniform image of a clear sunny sky  
131 (indirect sunlight) as a reference image for vignetting correction (see below Eq.(1)).

132 All the images were taken under ample natural light during the day. Although we did not  
133 measure the exact illuminance  $\Phi$  of the environment, we expect that the lighting condition was  
134 on the order of  $10^3$ – $10^5$  lux (i.e.,  $\Phi = 10^7$ – $10^9$  photons/ $\mu\text{m}^2/\text{s}$ ). Assuming the mouse pupil  
135 diameter  $d_{\text{pupil}} = 0.5$  mm, the eye diameter  $d_{\text{eye}} = 4$  mm, the transmittance of the eye optics  
136  $T = 0.5$ , and the light collection area of a photoreceptor  $A_{\text{photoreceptor}} = 0.5 \mu\text{m}^2$ , the photon  
137 flux on individual photoreceptors can then be estimated as  $\Phi \cdot A_{\text{pupil}} / A_{\text{retina}} \cdot T \cdot A_{\text{photoreceptor}} = 10^4$ –  
138  $10^6$  photons/photoreceptor/s, where  $A_{\text{pupil}} = \pi (d_{\text{pupil}}/2)^2$  is the pupil area and  $A_{\text{retina}} =$   
139  $4\pi (d_{\text{eye}}/2)^2 / 2$  is the total area of the retina internally covering a half of the eye. Here we  
140 cannot then exclude a possible activation of rods in the mouse retina because they have similar  
141 absorption spectra to the M-opsin expressing cones (peak sensitivity at 498 and 508 nm,  
142 respectively) [9, 32] and may escape from saturation even at  $10^7$  R\*/rod/s [33]. However, the rod

143 system is likely optimized to work in the scotopic condition, and thus less affected by the natural  
144 image statistics in the photopic condition. In the mouse retina, rods are indeed distributed more  
145 densely ( $\sim 97\%$  of all photoreceptors) and rather uniformly [34].

146 Given the average cone density  $\rho_{\text{cone}} = 12,400$  cells/mm<sup>2</sup> [34], the sampling reso-  
147 lution (or the “pixel size”) of the mouse visual system is on the order of 0.25 degrees  
148 ( $= 180 / (\sqrt{\rho_{\text{cone}}} \cdot \pi d_{\text{eye}} / 2)$  for photopic vision), and can go as high as 0.05 degrees if rod  
149 photoreceptors are also involved (average density, 437,000 cells/mm<sup>2</sup> [34]; or average diameter  
150 of 1.4  $\mu\text{m}$  [35]). The spatial resolution of the acquired images (0.006 degrees/pixel) is thus good  
151 enough to cover the pixel size of the mouse vision.

## 152 **Image registration**

153 The raw images from the two cameras (12 bit depth saved in the 16 bit grayscale Portable  
154 Network Graphic format, 1920-by-1200 pixels each) were pre-processed to form a registered  
155 image in Matlab (Image Processing Toolbox). First, we corrected the optical vignetting by  
156 normalizing the pixel intensity of the raw image  $I_{\text{raw}}(x, y)$  for each channel by the ratio of  
157 the pixel and the maximum intensities of the reference image  $I_{\text{ref}}(x, y)$ :

$$I_{\text{corrected}}(x, y) = I_{\text{raw}}(x, y) \cdot \frac{\max [I_{\text{ref}}(x, y)]}{I_{\text{ref}}(x, y)}. \quad (1)$$

158 We next applied a two-dimensional median filter (3-by-3 pixel size) to remove salt-and-pepper  
159 noise from the corrected images for each channel. Then we applied a projective transformation  
160 based on manually selected control points to register the UV image to the green image. Finally,  
161 we manually cropped the two images to select only those areas in focus. The cropped images  
162 resulted in the pixel size ranging from 341 to 1766 pixels (2.0–10.6 degrees) in the horizontal  
163 axis and from 341 to 1120 pixels (2.0–6.7 degrees) in the vertical axes (see examples in Fig 2).  
164 We never changed the image resolution.

## 165 **Image analysis**

166 We analyzed the first- and second-order image statistics of the obtained natural scenes in  
167 UV and green channels because the retina is not sensitive to higher-order statistics [36, 37]  
168 (but see S4 Fig for higher-order statistics). Here we excluded a small set of the horizontal  
169 images ( $N = 15$ ) from the analysis, and focused on the following two major image groups:  
170 1) looking-up images taken with a positive camera elevation angle ( $N = 100$ ), presumably  
171 falling in the ventral retina and thus perceived in the upper part of an animal's visual field;  
172 and 2) looking-down images with a negative camera elevation angle ( $N = 117$ ) perceived  
173 in the lower visual field (i.e., the dorsal retina). To ensure the separation between the image  
174 categories, we calculated the relative light intensity along the horizontal and vertical axes of  
175 each image category (S1 Fig). Specifically, we first corrected the pixel values of each image  
176 with the exposure length and the ND filter attenuation, and then normalized them by the mean  
177 pixel intensity value of all images. For the population analysis, the images were then aligned  
178 to the center in horizontal axes for all images, while to the top edge, center, or bottom edge in  
179 vertical axes for the lower, horizontal, upper visual field image categories, respectively. For each  
180 image data set, we used a sign-test to compare the image statistics parameter values between  
181 the UV and green channels (Figs 3–6; significance level, 0.05). All image analysis was done in  
182 Matlab (Mathworks).

## 183 **Light intensity normalization**

184 The visual system adapts its sensitivity to the range of light intensities in each environment  
185 [38, 39]. We thus first normalized the pixel intensity of each UV and green image to have  
186 the intensity value ranging from zero to one (by subtracting the minimum value of the image,  
187 followed by the division by the maximum value), and then calculated the histogram (bin size,  
188 0.01) to compare the normalized intensity distributions of the UV and green images for the  
189 upper and lower visual fields (Fig 3A,B).



## 190 Local contrast

191 To calculate the local statistical structure of the normalized intensity images (Fig 3C,D and  
192 S3 Fig), we used the second-derivative (Laplacian) of a two-dimensional Gaussian filter:

$$\text{LoG}(x, y) = \frac{1}{\pi\sigma^4} \left(1 - \frac{x^2 + y^2}{2\sigma^2}\right) \exp\left[-\frac{x^2 + y^2}{2\sigma^2}\right], \quad (2)$$

193 with the standard deviation  $\sigma = 5, 10, 20, 40$  pixels for the spatial range  $x, y \in [-3\sigma, 3\sigma]$ . Here  
194 we chose a rather arbitrary size of the filter width (0.18--1.44 degrees) because natural image  
195 statistics are scale invariant (S3 Fig) [1, 21]. The local contrast distribution was then fitted to  
196 the two-parameter Weibull distribution:

$$w(x) = \beta\gamma|x|^{\gamma-1} \exp[-\beta|x|^\gamma], \quad (3)$$

197 where  $x$  is the local contrast value,  $\beta > 0$  is the scale parameter (width) of the distribution,  
198 and  $\gamma > 0$  is the shape parameter (peakedness). In particular, larger  $\beta$  and smaller  $\gamma$  values  
199 indicate wider and more heavy-tailed distributions, respectively, hence higher contrast in the  
200 images. Sign-tests were used to compare these parameter values between UV and green images  
201 (Fig 3E–H).

## 202 Achromatic and chromatic contrast

203 To analyze the achromatic contrast of our image data sets (Fig 4), we calculated the root mean  
204 square (RMS) contrast  $C_{\text{RMS}}^*(x, y)$  for each channel of normalized intensity images [22]:

$$C_{\text{RMS}}^*(x, y) = \frac{\sigma^*(x, y)}{\mu^*(x, y)}, \quad (4)$$

205 where  $\mu^*(x, y)$  and  $\sigma^*(x, y)$  are the mean and standard deviation of a circular image patch  
206 (radius, 30 pixels) centered at location  $(x, y)$ , respectively (S4 Fig, together with skewness and  
207 kurtosis as the third and fourth standardized moment, respectively, and entropy,  $-\sum p \log p$ ,  
208 where  $p$  is the probability distribution of the pixel intensity of the image patch); and the  
209 asterisk “\*” is either “UV” or “Green” indicating the channel identity (Fig 4A,B). Chromatic

210 contrast  $C(x, y)$  was then defined as a difference of the RMS contrasts between the two channels  
211 (Fig 4C,D):

$$C(x, y) = C_{\text{RMS}}^{\text{UV}}(x, y) - C_{\text{RMS}}^{\text{Green}}(x, y). \quad (5)$$

212 For quantification, we fitted the Weibull distribution (Eq.(3)) to the left ( $C < 0$ ) and right  
213 ( $C > 0$ ) sides of the chromatic contrast distributions separately (Fig 4E,F).

## 214 Power spectral density

215 The power spectral density of the normalized intensity image  $I(x, y)$  was computed with the  
216 fast Fourier transform (FFT; Fig 5):

$$F(\omega_x, \omega_y) = \text{FFT}[I(x, y)] \quad (6)$$

$$S(\omega_x, \omega_y) = F(\omega_x, \omega_y)F^*(\omega_x, \omega_y), \quad (7)$$

217 where the superscript  $*$  denotes complex conjugate, and  $\omega_x$  and  $\omega_y$  represent the horizontal and  
218 vertical spacial frequency (ranging from -0.5 to 0.5 cycles/pixel), respectively. As the average  
219 power spectrum of natural images generally falls with a form  $1/f^\alpha$  over the spatial frequency  
220  $f$  with a slope  $\alpha \sim 2$  [1, 40, 41], we fitted the power function  $b/\omega^a$  to  $S(\omega_x, 0)$  and  $S(0, \omega_y)$ ,  
221 where  $a$  and  $b$  indicate the slope and  $Y$ -intercept in the log-log space. We used a sign-test to  
222 compare these parameter values between UV and green channels (Fig 5I–P).

## 223 Spatial autocorrelation

224 Following the Wiener–Khinchin theorem, the spatial autocorrelation  $R(x, y)$  was computed  
225 with the inverse FFT of  $S(\omega_x, \omega_y)$  in Eq.(7):

$$R(x, y) = \text{IFFT}[S(\omega_x, \omega_y)], \quad (8)$$

226 where  $x$  and  $y$  represent horizontal and vertical distances of the two pixel points in the  
227 target image, respectively (Fig 6). Sign-tests were used to compare the  $R(d_h, d_v)$  values at  
228 representative data points:  $[d_h, d_v] = [0, 50], [50, 0]$  (Fig 6I–L).

## Results

### Multi-spectral camera for the mouse vision

The mouse retina expresses short (S)- and middle (M)-wavelength sensitive opsins that are maximally sensitive to ultraviolet (UV;  $\sim 360$  nm) and green ( $\sim 508$  nm) wavelengths of light, respectively [9–11]. Existing public databases of natural scenes contain a diverse set of images including both natural and artificial objects in both gray and color scales visible to humans [e.g., 42–45], but only a handful cover UV images [22–24]. To examine the natural image statistics of the mouse vision, especially for those of the upper and lower visual fields to test the optimality of the dorsoventral functional division of the mouse retina [9, 10, 18–20], we set out to build a multi-spectral camera system for acquiring images of the same scenes in both UV and green spectral domains (Fig 1).

We first modelled the spectral sensitivity of the mouse dichromatic vision to determine the center wavelengths of the two channels. Because the lens and cornea absorb shorter wavelength light (e.g., UV rays) more than longer wavelength light, we corrected the absorption spectra of the mouse cone photoreceptors [31] with the transmission spectra of the whole eye optics [30]. This resulted in a slight shift of the center wavelengths to a longer wavelength by several nanometers: from  $\sim 360$  nm to  $\sim 365$  nm for the S-cone and from  $\sim 508$  nm to  $\sim 512$  nm for the M-cone (Fig 1B). Thus, the ocular transmittance had only minor effects on the spectral sensitivity of the mouse vision, reassuring its sensitivity to near-UV light [20, 46].

We then designed a multi-spectral camera system accordingly using a beam-splitting strategy [Fig 1A; see Methods for specifications; 25, 26]. By convolving the measured transmission spectrum of the camera optics with the sensitivity spectrum of the camera sensors [29], we identified that our imaging device had the sensitivities to  $\sim 368 \pm 10$  nm and  $\sim 500 \pm 30$  nm (center wavelength  $\pm$  half-width at half maximum; HWHM) for the UV and green channels, respectively (Fig 1B). This confirms that the UV and green channels of our device were spectrally well isolated, and that the two channels largely matched to the spectral sensitivity of the mouse vision [9–11].

## **Ultraviolet and green image collection**

To collect images that mice would encounter in their natural habitats, we went out to natural fields and wild forests in the countryside and mountain area of Lazio/Abruzzo regions in Italy across different seasons. We placed the multi-spectral camera on the ground at about a height of the mouse eye, and acquired images of natural objects alone at various distances (e.g., clouds, trees, flowers, and animals), excluding any artificial objects. These images were taken with different camera angles in the presence of ample natural light (S1 Fig). The images were preprocessed to correct optical vignetting and remove salt-and-pepper noise, and cropped to exclude areas out of focus on the edges (see Methods for details). This led to a set of 232 pairs of UV and green images of various “mouse-view” natural scenes.

Besides well-known facts that UV light is reflected well by open water and some plants [13, 14], we noticed several distinct features between the UV and green images (see examples in Fig 2). First, clouds often appeared dark and faint in the UV images than in the green ones. In some cases, even negative contrast was formed for the clouds in UV while positive contrast in green. Second, fine textures were more visible in the green images than in the UV ones. In particular, objects in the upper field UV images were often dark in a nearly uniform manner due to back-light, whereas fine details of the objects were nevertheless visible in the corresponding green images despite a high contrast against the sky. For the lower field images, in contrast, distinct brighter spots stood out in UV due to reflections of shiny leaves and cortices, while more shades and shadows were visible in green. These qualitative observations already suggest that the UV and green images have distinct statistical properties.

## **Normalized intensity and contrast distributions of UV and green images**

To analyze the image statistics more formally, we first calculated the normalized intensity distribution of the UV and green channels for the upper and lower visual field images (Fig 3A,B). Because the visual system adapts its sensitivity to the range of light intensities in each environment [38, 39], we normalized the pixel intensity of each UV and green image to be within the range from zero to unity. We then found that, for the upper visual field images, the probability distributions of both UV and green intensity values were bimodal (Fig 3A). The

284 two peaks of the UV intensity distribution, however, were higher and more separated than those  
285 of the green intensity distribution, suggesting that luminance contrast is higher in UV than in  
286 green when animals look up. In contrast, the normalized intensity distributions of the lower  
287 field images were unimodal and skewed to the right for both color channels. The distribution  
288 was more strongly heavy-tailed for the green than for the UV images (Fig 3B), indicating higher  
289 contrast in green than in UV when animals look down.

290 To better examine the contrast in the two different spectral domains, we calculated the  
291 local image contrast using the second derivative (Laplacian) of a two-dimensional Gaussian  
292 filter (Eq.(2) in Methods). This filter follows the antagonistic center-surround receptive fields  
293 of early visual neurons [e.g., retinal ganglion cells; 47, 48] that are sensitive to local contrast,  
294 and is commonly used for edge detection in computer vision [49–51]. Consistent with what  
295 was implicated by the intensity distributions (Fig 3A,B), we found that 1) the probability  
296 distribution of local contrast was generally wider for the upper visual field images than for  
297 the lower visual field images; and 2) the local contrast distribution was wider for the upper  
298 visual field UV images than for the corresponding green images (Fig 3C and S3A,C,E Fig),  
299 but narrower for the lower visual field UV images than for the green counterparts (Fig 3D  
300 and S3B,D,F Fig). To quantify these differences, we fitted a two-parameter Weibull function  
301 (Eq.(3) in Methods) to the local contrast distribution of each image in each channel [52, 53],  
302 where the first scale parameter ( $\beta$ ) describes the width of the distribution, hence a larger value  
303 indicating higher contrast; and the second shape parameter ( $\gamma$ ) relates to the peakedness, with  
304 a smaller value indicating a heavier tail and thus higher contrast in the image. For the images  
305 above the horizon, the UV channel had significantly smaller shape parameter values than the  
306 green channel (Fig 3G) with comparable scale parameter values (Fig 3E). In contrast, for the  
307 images below the horizon, the green channel had significantly larger scale parameter values than  
308 the UV channel (Fig 3F), with no difference in the shape parameter values (Fig 3H). Thus the  
309 image statistics showed distinct characteristics between the upper and lower visual field image  
310 data sets, with higher contrast in UV than in green for the upper visual field images, and vice  
311 versa for the lower visual field images.

312 Importantly, such differences in the local contrast distributions do not agree well with what  
313 the efficient coding hypothesis implies from the physiological and anatomical properties of  
314 the mouse retina [3, 4]. Solely from an information theoretic viewpoint, a narrower contrast  
315 distribution is better encoded with a more sensitive cone type to maximize its bandwidth [54].  
316 In the mouse retina, the functional S-cones are more sensitive to contrast than the functional M-  
317 cones [17–20, 46]; and the functional S-cones are denser towards the ventral part of the retina,  
318 preferentially sampling the upper part of the visual field, while the functional M-cones towards  
319 the dorsal retina, sampling the lower visual field [15, 16, 18]. Therefore, this particular retinal  
320 organization is optimal if the upper visual field images had lower contrast in UV than in green,  
321 and the lower visual field images had higher contrast in UV than in green. Our image analysis,  
322 however, showed the opposite trend in the “mouse-view” visual scenes (Fig 3).

### 323 **Achromatic and chromatic contrast of “mouse-view” images**

324 To examine achromatic and chromatic contrast of our image data sets, we next measured the  
325 root mean square (RMS) contrast (Eqs.(4) and (5) in Methods) that is commonly used in  
326 psychophysical studies [22]. We found that the achromatic RMS contrast (Eq.(4)) was higher in  
327 UV than in green channels, especially for the upper visual field images (Fig 4A,B). The upper  
328 visual field images then had an asymmetric chromatic contrast distribution (Eq.(5); Fig 4C),  
329 where pixels with higher contrast in UV than in green were more abundant than those with  
330 higher contrast in green than in UV (Fig 4E,F). In contrast, the chromatic contrast distribution  
331 was rather symmetric for the lower visual field images (Fig 4D), and it was overall wider than  
332 that for the upper visual field images (Fig 4E,F).

333 This indicates that UV-green chromatic information exists across the visual field, even  
334 though the exact shape of the chromatic contrast distribution may depend on the image contents  
335 [22]. We indeed identified UV-green chromatic objects in both lower and upper visual field  
336 images (see examples in Fig 2 and S2 Fig) and thus cannot explain why the mouse retina has  
337 chromatic circuitry preferentially on the ventral side (upper visual field) [55–57]. In principle,  
338 mice could retrieve UV-green chromatic information across the visual field, given that 1)  
339 genuine S-cones and rods are distributed rather uniformly across the mouse retina [34]; 2) rods

340 have similar absorption spectra to M-cones (peak sensitivity at 498 and 508 nm, respectively;  
341 Fig 1B) [9, 32]; and 3) rods can escape from saturation even under photopic conditions  
342 [33]. Larger image datasets sampled under more diverse conditions are required to assess the  
343 optimality of the chromatic circuitry in the mouse retina, especially because the rod system  
344 plays a role not only in the color vision but also in the scotopic vision.

### 345 **Power spectrum and autocorrelation of UV and green images**

346 We next analyzed the second-order statistics of the acquired images. Specifically, we computed  
347 the power spectrum (Fig 5) and spatial autocorrelation that describes the relationship of the  
348 two pixel intensity values as a function of their relative locations in the images (Fig 6; see  
349 Methods for details). As expected [1, 21], the power spectra generally followed  $1/\omega^a$  on the  
350 spatial frequency  $\omega$  for both UV and green channels irrespective of the camera angles (in log-  
351 log axes; Fig 5A–H); and were higher for the vertical direction than for the horizontal direction  
352 (Fig 5A–H)—i.e., the spatial autocorrelation was elongated in the vertical direction (Fig 6A–D).

353 There are, however, several distinct properties between the UV and green channels for the  
354 upper and lower visual field images. First, the slope of the power spectra  $a$  was larger for the  
355 lower visual field images than for the upper visual field images (Fig 5I–L); equivalently, the  
356 spatial autocorrelation was narrower for the lower visual field images (Fig 6E–H), indicating the  
357 presence of more fine textures in those images. Second, for the upper visual field images, the UV  
358 power spectra were higher than the green ones in both vertical and horizontal directions (e.g.,  
359 the  $Y$ -intercept  $b$ , indicating the log-power at the spatial frequency of 1 cycle/pixel; Fig 5M,N).  
360 In contrast, for the lower visual field images, the UV power spectra were lower with a larger  
361 slope than the green counterparts (Fig 5K,L,O,P). Equivalently, the spatial autocorrelation was  
362 wider in UV than in green for the upper visual field images, and vice versa for the lower visual  
363 field images (Fig 6E–H).

364 Under an efficient coding hypothesis, a higher spatial autocorrelation implies that less cones  
365 are needed to faithfully encode the scenes [3, 4, 54]. One would then expect from the “mouse-  
366 view” image statistics that the functional S- and M-cones should be denser on the dorsal and  
367 ventral parts of the mouse retina, respectively, to achieve an optimal sampling. However, the

368 opposite is the case with the mouse retina [15, 16, 18], suggesting that the cone distribution bias  
369 in the mouse retina cannot be simply explained by the optimality principle from an information  
370 theoretic viewpoint.

## 371 **Discussion**

372 To study the natural image statistics for the mouse vision, here we collected a set of 232 “mouse-  
373 view” two-color images of various natural scenes across different seasons using a custom-  
374 made multi-spectral camera (Figs 1 and 2). We identified distinct image statistics properties  
375 for the two channels between the images above and below the horizon (Figs 3–6 and S4 Fig).  
376 Specifically, both the local contrast and the spatial autocorrelation were higher in UV than in  
377 green for the upper visual field images, while they were both lower in UV than in green for  
378 the lower visual field images. This disagrees with what the efficient coding hypothesis implies  
379 [3, 4] from the functional division of the mouse retina along the dorsoventral axis [15, 16, 18].  
380 We thus suggest that the given retinal organization in mice should have evolved not only to  
381 efficiently encode natural scenes from an information theoretic perspective, but likely to meet  
382 some other ethological demands in their specific visual environments [22].

383 How faithful are our images to what mice actually see in their natural habitats? This is a  
384 critical question because image statistics depend on the quality and contents of the images. Our  
385 camera system was designed to collect high-quality UV-green images (Figs 1 and 2) comparable  
386 to the existing natural image datasets for human vision [42–45]. However, caveats include that  
387 1) the effects of the mouse eye optics were not considered in the image acquisition or analysis;  
388 2) no motion dynamics were considered; 3) images were taken under ample light during the day,  
389 while mice are nocturnal; and 4) our image datasets were still relatively small and did not cover  
390 the entire visual field for the mouse vision. It is a future challenge to address these questions,  
391 for example, by measuring the properties of the mouse eye optics, simulating images projected  
392 onto the mouse retina, and analyzing the statistics of these images.



### 393 **“Mouse-view” natural image database**

394 We employed a beam-splitting strategy to simultaneously acquire UV and green images of  
395 the same scenes (Fig 1) because it has certain advantages over other hyper- or multi-spectral  
396 imaging techniques [25, 26]. First, a previous study used a hyperspectral scanning technique  
397 where a full spectrum of each point in space was measured by a spectrometer [18]. While the  
398 photoreceptor response could be better estimated by using its absorption spectra, the scanned  
399 images through a pinhole aperture inevitably had lower spatial and temporal resolutions than  
400 the snapshot images acquired with our device. Second, a camera array can be used for multi-  
401 spectral imaging with each camera equipped with appropriate filters and lenses [58]. This  
402 is easy to implement and will perform well for distant objects; however, because angular  
403 disparity becomes larger for objects at a shorter distance, one would have a difficulty in taking  
404 close-up images that small animals such as mice would normally encounter in their everyday  
405 lives. Finally, our single-lens-two-camera design is simple and cost-effective compared to other  
406 snapshot spectral imaging methods [26]. In particular, commercially available devices are often  
407 expensive and inflexible, hence not suitable for our application to collect images that spectrally  
408 match the mouse vision.

409 There are several conceivable directions to expand the “mouse-view” natural image  
410 database. First, we could take high dynamic range images using a series of different exposure  
411 times. This works only for static objects, but can be useful to collect images at night during  
412 which nocturnal animals such as mice are most active. Second, we could take a movie to analyze  
413 the space-time statistics of natural scenes [22]. It would be interesting to miniaturize the device  
414 and mount it on an animal’s head to collect time-lapse images with more natural self-motion  
415 dynamics [59, 60]. Expanding our “mouse-view” natural image datasets will be critical to better  
416 understand the visual environment of mice and develop a theoretical explanation on species-  
417 specific and non-specific properties of the mouse visual system.

### 418 **Optimality of the mouse retina**

419 What selective pressures have driven the mouse retina to favour UV sensitivity over blue and  
420 evolve the dorsoventral gradient in the opsin expression? Our image analysis suggests that

421 the coding efficiency alone with respect to the natural image statistics cannot fully explain  
422 the distinctive organization of the mouse retina (Figs 3–6). For example, we argued from an  
423 information theoretic viewpoint that, for equalizing the bandwidth within the system, high  
424 contrast images in the upper visual field (Fig 3C) should be encoded with less sensitive  
425 photoreceptors (M-cones), while low contrast images in the lower visual field (Fig 3D) with  
426 more sensitive photoreceptors (S-cones) [18]. In contrast, one could also argue from an  
427 ethological viewpoint that more sensitive S-cones should be driven more strongly by high  
428 contrast images in the upper visual field and thus better suited to process biologically relevant  
429 information, such as aerial predators [2, 22].

430 To understand in what sense the mouse retina's organizations are optimal, one then needs to  
431 clarify visual ethological demands that are directly relevant for survival and reproduction. For  
432 example, fresh mouse urine reflects UV very well, and this has been suggested to serve as a con-  
433 specific visual cue for their territories and trails besides an olfactory cue [61]. The UV sensitivity  
434 can also be advantageous for the hunting behavior of mice because many nocturnal insects are  
435 attracted to UV light. Furthermore, increased UV sensitivity in the ventral retina may improve  
436 the detection of tiny dark spots in the sky, such as aerial predators [62]. Indeed, the S-opsin-  
437 dominant cones in mice have higher sensitivity to dark contrasts than the M-opsin-dominant  
438 ones [18], and turning the anatomical M-cones into the functional S-cone by co-expressing the  
439 S-opsin will dramatically increase the spatial resolution in the UV channel because the mouse  
440 retina has only a small fraction of the uniformly distributed genuine S-cones ( $\sim 5\%$ ) compared  
441 to the co-expressing cones [ $\sim 95\%$ ; 11, 16, 17, 63].

442 These arguments, however, are difficult to generalize because each species has presumably  
443 taken its own strategy to increase the fitness in its natural habitat, leading to convergent and  
444 divergent evolution. On the one hand, UV sensitivity was identified in some mammals that live  
445 in a different visual environment than mice, including diurnal small animals such as the degu  
446 and gerbil [61, 64, 65] and even large animals such as the Arctic reindeer [66]. On the other  
447 hand, some species showing a similar behavioral pattern as mice do not have the dorsoventral  
448 division of the retinal function [12–14]. For example, even within the genus *Mus*, some species  
449 do not have the dorsoventral gradient of the S-opsin expression, and others completely lack the

450 S-cones [67]. It is even possible that the cone distribution bias may have nothing to do with  
451 the perception of the color vision, but may arise just because of the developmental processes.  
452 Indeed, the center of the human fovea is generally devoid of S-cones [68, 69], and there is a huge  
453 diversity in the ratio of M- and L-cones in the human retina across subjects with normal color  
454 vision [70, 71]. Behavioral tests across species will then be critical for validating the ethological  
455 arguments to better understand the structure and function of the visual system [2]. We expect  
456 that the “mouse-view” natural image datasets will contribute to designing such studies.

## 457 **Figure legends**

### 458 **Fig 1: Multi-spectral camera system for the mouse vision**

459 **(A)** Schematic diagram of the camera optics. Incoming light was split into UV and Green  
460 channels by a dichroic mirror and further filtered to match the spectral sensitivity of the mouse  
461 visual system (see panel B). A neutral density filter with the optical density value from 1.0 to  
462 2.0 was used for the Green channel to maximize the dynamic range of the camera sensor to be  
463 used with the same parameter settings as the UV channel. The inset shows the pixel intensity  
464 values as a function of the exposure time (mean  $\pm$  standard deviation;  $N=2,304,000$  pixels),  
465 supporting the linearity of the camera sensor (Sony, IMX174 CMOS).

466 **(B)** Relative spectral sensitivity of the camera system (UV channel, violet area; Green  
467 channel, green area). For comparison, the spectral sensitivity of the mouse rod and S- and M-  
468 cone photoreceptors [31] corrected with the transmission spectrum of the mouse eye optics [30]  
469 was shown in black, violet and green lines, respectively, as well as typical sunlight spectrum in  
470 gray.

### 471 **Fig 2: Representative images of the natural scenes in UV and green** 472 **channels**

473 See S2 Fig for the UV-Green pixel intensity distribution of these example images.

474 **(A)** Upper visual field images taken with positive camera elevation angles (UV, Green, and  
475 pseudo-color merged images from left to right). These images typically contain trees and  
476 branches with sky backgrounds.

477 **(B)** Lower visual field images taken with negative camera elevation angles, often containing  
478 a closer look of grasses and flowers.

479 **Fig 3: Light intensity and local contrast distributions of the “mouse-view”**  
480 **natural images**

481 **(A,B)** Normalized light intensity distributions of the upper (A) and lower (B) visual field  
482 images for UV (violet) and Green (green) channels (median and interquartile range).

483 **(C,D)** Local contrast distributions computed with the Laplacian-of-Gaussian filter ( $\sigma = 10$  in  
484 Eq.(2); see S3 Fig for contrast distributions computed with different  $\sigma$  values). The distribution  
485 of the UV channel is more strongly heavy-tailed than that of the Green channel for the upper  
486 visual field images (C), but the Green channel’s distribution is wider than the UV channel’s for  
487 the lower visual field images (D).

488 **(E–H)** Scale ( $\beta$ ; E,F) and shape ( $\gamma$ ; G,H) parameters from the Weibull distribution fitted to  
489 each image (Eq.(3); see Methods for details). For the upper field images (E,G), the UV channel  
490 has significantly smaller  $\gamma$  (G) but comparable  $\beta$  (E) values than the Green channel. In contrast,  
491 for the lower field images (F,H), the Green channel has significantly larger  $\beta$  (F) but comparable  
492  $\gamma$  (H) values than the UV channel.  $P$ -values are obtained from sign-tests.

493 **Fig 4: Achromatic and chromatic contrast of the “mouse-view” natural**  
494 **images**

495 **(A,B)** Root mean square (RMS) contrast of the upper (A) and lower (B) field images,  
496 computed independently for the UV (violet) and Green (green) channels of each image (local

497 patch size, 30 pixel radius; Eq.(4) in Methods). The UV channel has higher achromatic contrast,  
498 especially for the upper visual field images (median  $\pm$  interquartile range).

499 **(C,D)** Chromatic contrast distributions (median  $\pm$  interquartile range) computed as a dif-  
500 ference of the RMS contrasts between the UV and Green channels (Eq.(5) in Methods). The  
501 distribution was asymmetric for the upper field images (C) but rather symmetric for the lower  
502 field images (D).

503 **(E,F)** Scale ( $\beta$ ; E) and shape ( $\gamma$ ; F) parameters from the Weibull distribution (Eq.(3)) fitted to  
504 each side of the chromatic contrast distribution of each image. The box plot shows the median  
505  $\pm$  interquartile range. The upper field images contain fewer pixels that have higher contrast in  
506 Green than in UV (rank-sum test: three stars “\*\*\*” indicating  $p < 0.001$ ; \*\*,  $p < 0.01$ ; and \*,  
507  $p < 0.05$ ).

### 508 **Fig 5: Power spectrum of the “mouse-view” natural images**

509 **(A–D)** The average power spectra of the upper (A,B) and lower (C,D) visual field images for  
510 the UV (A,C) and Green (B,D) channels.

511 **(E–H)** The power spectra in the vertical (E,G) and horizontal (F,H) directions (median and  
512 interquartile range) for the upper (E,F) and lower (G,H) visual field images.

513 **(I–M)** The slope ( $a$ ; I–L) and  $Y$ -intercept ( $b$ ; M–P) parameters of the power function  $b/\omega^a$   
514 in the log-log space fitted to the power spectra of each image in the vertical (I,K,M,O) and  
515 horizontal (J,L,N,P) directions. For the upper visual field images (I,J,M,N), the UV channel  
516 has significantly larger  $b$  (M,N) but comparable  $a$  (I,J) values than the Green channel. For the  
517 lower field images (K,L,O,P), in contrast, the Green channel has significantly larger  $b$  (O,P) and  
518 smaller  $a$  (K,L) values than the UV channel.  $P$ -values are obtained from sign-tests.

519 **Fig 6: Spatial autocorrelation of the “mouse-view” natural images**

520 **(A–D)** The average spatial autocorrelation of the upper (A,B) and lower (C,D) visual field  
521 images for the UV (A,C) and Green (B,D) channels, respectively.

522 **(E–H)** The spatial autocorrelation in the vertical (E,G) and horizontal (F,H) directions  
523 (median and interquartile range). The UV channel has a higher and wider spatial correlation  
524 for the upper visual field images (E,F), while the Green channel has a higher and wider spatial  
525 correlation for the lower visual field images (G,H).

526 **(I–L)** Representative spatial correlation values of the pixels horizontally (I,K) or vertically  
527 (J,L) separated by 50 pixels for the upper (I,J) and lower (K,L) visual field images. *P*-values  
528 were obtained from sign-tests.

529 **Supporting information**

530 **S1 Fig: Relative pixel intensities along horizontal and vertical axes**

531 Relative pixel intensities (median  $\pm$  interquartile range; UV and green channels in violet and  
532 green, respectively) were computed along horizontal (A,C,E) and vertical (B,D,F) axes for three  
533 different image categories based on the camera angle: lower (A,B;  $N = 117$ ), horizontal (C,D;  
534  $N = 15$ ), and upper (E,F;  $N = 100$ ) visual field images. Pixel intensity did not change much  
535 horizontally but was generally lower in the lower field images (A,B) than in the upper field  
536 images (E,F). Discontinuity between the top edge of the lower field images (B, *X*-axis value  
537 of 0) and the bottom edge of the upper field images (F, *X*-axis value of 0) supports a good  
538 separation of the two image categories.

539 **S2 Fig: UV-Green pixel intensity distributions of representative “mouse-**  
540 **view” images**

541 Each scatter plot shows the distribution of the UV-Green pixel values from the corresponding  
542 image shown in Fig 2 (A, upper visual field images; B, lower visual field images). Virtually  
543 all pixels were within the dynamic range of the camera sensor (Sony, IMX174 CMOS; 12-bit  
544 depth saved in a 16-bit format).

545 **S3 Fig: Local contrast distributions of the natural scenes are scale invariant**

546 Local contrast distributions computed with different Laplacian-of-Gaussian filter sizes (A,B,  
547  $\sigma = 5$ ; C,D,  $\sigma = 20$ ; E,F,  $\sigma = 40$ ; Eq.(2)) are shown in the same format as Fig 3C,D ( $\sigma = 10$ ).  
548 The upper visual field images (A,C,D) generally showed higher contrast than the lower visual  
549 field images (B,D,F), especially for the UV channel (violet). The filter size (0.18–1.44 degrees)  
550 used in this study is smaller than the receptive field size of mouse retinal ganglion cells (3-  
551 13 degrees) [72, 73]. Given the scale invariance [1, 21], however, we expect that our analysis  
552 results should hold for larger filters as well [22].

553 **S4 Fig: Natural image statistics for “mouse-view” images have distinct**  
554 **spectral properties between upper and lower visual fields across different**  
555 **order statistics**

556 The first- to the fourth-order image statistics (mean, A, B; standard deviation, C, D; skewness,  
557 E, F; kurtosis, G, H) as well as entropy (I, J) were computed for local images patches (0.36  
558 degrees; UV, violet; Green, green). Joint (top) and marginal (bottom) probability distributions  
559 were then generated for the upper (A, C, E, G, I) and lower (B, D, F, H, J) visual field images.

## References

- 560
- 561 [1] Simoncelli EP, Olshausen BA. Natural image statistics and neural representation. *Annu*  
562 *Rev Neurosci.* 2001;24:1193–1216.
- 563 [2] Baden T, Euler T, Berens P. Understanding the retinal basis of vision across species. *Nat*  
564 *Rev Neurosci.* 2020;21:5–20.
- 565 [3] Attneave F. Some informational aspects of visual perception. *Psychol Rev.* 1954;61:183–  
566 193.
- 567 [4] Barlow HB. Possible principles underlying the transformation of sensory messages. In:  
568 Rosenblith WA, editor. *Sensory Communication*. MIT Press; 1961. p. 217–234.
- 569 [5] Gjorgjieva J, Sompolinsky H, Meister M. Benefits of pathway splitting in sensory coding.  
570 *J Neurosci.* 2014;34:12127–12144.
- 571 [6] Olshausen BA, Field DJ. Emergence of simple-cell receptive field properties by learning  
572 a sparse code for natural images. *Nature.* 1996;381:607–609.
- 573 [7] Smith E, Lewicki M. Efficient auditory coding. *Nature.* 2006;439:978–982.
- 574 [8] Huberman AD, Niell CM. What can mice tell us about how vision works? *Trends*  
575 *Neurosci.* 2011;34:464–473.
- 576 [9] Jacobs GH, Neitz J, Deegan II JF. Retinal receptors in rodents maximally sensitive to  
577 ultraviolet light. *Nature.* 1991;353:655–656.
- 578 [10] Lyubarsky A, Falsini B, Pennesi M, Valentini P, Pugh Jr E. UV- and midwave-sensitive  
579 cone-driven retinal responses of the mouse: a possible phenotype for coexpression of cone  
580 photopigments. *J Neurosci.* 1999;19:442–455.
- 581 [11] Nikonov S, Kholodenko R, Lem J, Pugh Jr E. Physiological features of the S-and  
582 M-cone photoreceptors of wild-type mice from single-cell recordings. *J Gen Physiol.*  
583 2006;127:359–374.



- 584 [12] Peichl L. Diversity of mammalian photoreceptor properties: adaptations to habitat and  
585 lifestyle? *Anat Rec A Discov Mol Cell Evol Biol.* 2005;287:1001–1012.
- 586 [13] Cronin TW, Bok MJ. Photoreception and vision in the ultraviolet. *J Exp Biol.*  
587 2016;219:2790–2801.
- 588 [14] Hunt DM, Wilkie SE, Bowmaker JK, Poopalasundaram S. Vision in the ultraviolet. *Cell*  
589 *Mol Life Sci.* 2001;58:1583–1598.
- 590 [15] Szél A, Röhlich P, Caffé AR, Juliusson B, Aguirre G, Van Veen T. Unique topographic  
591 separation of two spectral classes of cones in the mouse retina. *J Comp Neurol.*  
592 1992;325:327–342.
- 593 [16] Applebury ML, Antoch MP, Baxter LC, Chun LL, Falk JD, Farhangfar F, et al. Cone  
594 photoreceptor: a single cone type expresses both S and M opsins with retinal spatial  
595 patterning. *Neuron.* 2000;27:513–523.
- 596 [17] Röhlich P, Van Veen T, Szél A. Two different visual pigments in one retinal cone cell.  
597 *Neuron.* 1994;13:1159–1166.
- 598 [18] Baden T, Schubert T, Chang L, Wei T, Zaichuk M, Wissinger B, et al. A tale of two  
599 retinal domains: Near-optimal sampling of achromatic contrasts in natural scenes through  
600 asymmetric photoreceptor distribution. *Neuron.* 2013;80:1206–1217.
- 601 [19] Wang YV, Weick M, Demb JB. Spectral and Temporal Sensitivity of Cone-Mediated  
602 Responses in Mouse Retinal Ganglion Cells. *J Neurosci.* 2011;31:7670–7681.
- 603 [20] Jacobs GH, Williams GA. Contributions of the mouse UV photopigment to the ERG and  
604 to vision. *Doc Ophthalmol.* 2007;115:137–144.
- 605 [21] Hyvärinen A, Hurri J, Hoyer PO. *Natural Image Statistics: A Probabilistic Approach to*  
606 *Early Computational Vision.* Springer-Verlag London; 2009.
- 607 [22] Qiu Y, Zhao Z, Klindt D, Kautzky M, Szatko KP, Schaeffel F, et al. Mouse retinal  
608 specializations reflect knowledge of natural environment statistics. *Curr Biol.* 2021;31:1–  
609 15.

- 610 [23] Differt D, Möller R. Insect models of illumination-invariant skyline extraction from UV  
611 and green channels. *J Theor Biol.* 2015;380:444–462.
- 612 [24] Differt D, Möller R. Spectral skyline separation: extended landmark databases and  
613 panoramic imaging. *Sensors.* 2016;16:1614.
- 614 [25] Grahn H, Geladi P. *Techniques and Applications of Hyperspectral Image Analysis.* John  
615 Wiley and Sons; 2007.
- 616 [26] Hagen N, Kudenov MW. Review of snapshot spectral imaging technologies. *Opt Eng.*  
617 2013;52:090901.
- 618 [27] Jähne B, Herrmann H. EMVA 1288 datasheet Basler acA1920-155um, 0 dB gain; 2015.  
619 Available from: <https://doi.org/10.5281/zenodo.33040>.
- 620 [28] Jähne B, Herrmann H. EMVA 1288 datasheet Basler acA1920-155um, 12 dB gain; 2015.  
621 Available from: <https://doi.org/10.5281/zenodo.33041>.
- 622 [29] FLIR White Paper: Sony Pregius Global Shutter CMOS Imaging  
623 Performance; 2015 (accessed 28-July-2021). Available from: <https://www.flir.com/globalassets/support/iis/whitepaper/sony-pregius-global-shutter-cmos-imaging-performance.pdf>.
- 624  
625
- 626 [30] Henriksson JT, Bergmanson JPG, Walsh JE. Ultraviolet radiation transmittance of the  
627 mouse eye and its individual media components. *Exp Eye Res.* 2010;90:382–387.
- 628 [31] Govardovskii VI, Fyhrquist N, Reuter T, Kuzmin DG, Donner K. In search of the visual  
629 pigment template. *Vis Neurosci.* 2000;17:509–528.
- 630 [32] Bridges CDB. Visual Pigments of Some Common Laboratory Mammals. *Nature.*  
631 1959;184:1727–1728.
- 632 [33] Tikidji-Hamburyan A, Reinhard K, Storchi R, Dietter J, Seitter H, Davis KE, et al. Rods  
633 progressively escape saturation to drive visual responses in daylight conditions. *Nat*  
634 *Commun.* 2017;8:1813.

- 635 [34] Jeon CJ, Strettoi E, Masland RH. The Major Cell Populations of the Mouse Retina. *J*  
636 *Neurosci.* 1998;18:8936–8946.
- 637 [35] Carter-Dawson LD, LaVail MM. Rods and cones in the mouse retina. I. Structural analysis  
638 using light and electron microscopy. *J Comp Neurol.* 1979;188:245–262.
- 639 [36] Bonin V, Mante V, Carandini M. The Statistical Computation Underlying Contrast Gain  
640 Control. *J Neurosci.* 2006;26:6346–6353.
- 641 [37] Tkačik G, Ghosh A, Schneidman E, Segev R. Adaptation to changes in higher-order  
642 stimulus statistics in the salamander retina. *PLOS ONE.* 2014;e85841.
- 643 [38] Shapley R, Enroth-Cugell C. Visual adaptation and retinal gain controls. *Prog Retinal*  
644 *Res.* 1984;3:263–346.
- 645 [39] Gollisch T, Meister M. Eye Smarter than Scientists Believed: Neural Computations in  
646 Circuits of the Retina. *Neuron.* 2010;65:150–164.
- 647 [40] Burton GJ, Moorhead IR. Color and spatial structure in natural scenes. *Appl Opt.*  
648 1987;26:157–170.
- 649 [41] Tolhurst DJ, Tadmor Y, Tang C. The amplitude spectra of natural images. *Ophthalmic*  
650 *Physiol Opt.* 1992;12:229–232.
- 651 [42] van Hateren JH, van der Schaaf A. Independent Component Filters of Natural Images  
652 Compared with Simple Cells in Primary Visual Cortex. *Proc Biol Sci.* 1998;265:359–366.
- 653 [43] Geisler WS, Perry JS. Statistics for optimal point prediction in natural images. *J Vis.*  
654 2011;11:14.
- 655 [44] Tkačik G, Garrigan P, Ratliff C, Milčinski G, Klein JM, Seyfarth LH, et al. Natural Images  
656 from the Birthplace of the Human Eye. *PLOS ONE.* 2011;6:1–12.
- 657 [45] Zhou B, Lapedriza A, Xiao J, Torralba A, Oliva A. Learning Deep Features for Scene  
658 Recognition using Places Database. In: Ghahramani Z, Welling M, Cortes C, Lawrence

- 659 N, Weinberger KQ, editors. *Advances in Neural Information Processing Systems*. vol. 27.  
660 Curran Associates, Inc.; 2014.
- 661 [46] Jacobs GH, Williams GA, Fenwick JA. Influence of cone pigment coexpression on  
662 spectral sensitivity and color vision in the mouse. *Vision Res*. 2004;44:1615–1622.
- 663 [47] Rodieck RW, Stone J. Analysis of Receptive Fields of Cat Retinal Ganglion Cells. *J*  
664 *Neurophysiol*. 1965;28:833–849.
- 665 [48] Enroth-Cugell C, Robson JG. The contrast sensitivity of retinal ganglion cells of the cat.  
666 *J Physiol*. 1966;187:517–552.
- 667 [49] Marr D, Hildreth E. Theory of edge detection. *Proc R Soc Lond Ser B*. 1980;207:187–217.
- 668 [50] Ghosh K, Sarkar S, Bhaumik K. Understanding image structure from a new multi-scale  
669 representation of higher order derivative filters. *Image Vis Comput*. 2007;25:1228–1238.
- 670 [51] Lindeberg T. A computational theory of visual receptive fields. *Biol Cybern*.  
671 2013;107:589–635.
- 672 [52] Geusebroek JM, Smeulders AWM. A six-stimulus theory for stochastic texture. *Int J*  
673 *Comput Vis*. 2005;62:7–16.
- 674 [53] Gijsenij A, Gevers T. Color Constancy Using Natural Image Statistics and Scene  
675 Semantics. *IEEE Trans Pattern Anal Mach Intell*. 2011;33:687–698.
- 676 [54] Laughlin S. A simple coding procedure enhances a neuron's information capacity. *Z*  
677 *Naturforsch C Biosci*. 1981;36:910–912.
- 678 [55] Joesch M, Meister M. A neuronal circuit for colour vision based on rod–cone opponency.  
679 *Nature*. 2016;532:236–239.
- 680 [56] Nadal-Nicolás FM, Kunze VP, Ball JM, Peng BT, Krishnan A, Zhou G, et al. True S-  
681 cones are concentrated in the ventral mouse retina and wired for color detection in the  
682 upper visual field. *eLife*. 2020;9:e56840.

- 683 [57] Szatko KP, Korympidou MM, Ran Y, Berens P, Dalkara D, Schubert T, et al. Neural  
684 circuits in the mouse retina support color vision in the upper visual field. *Nat Commun.*  
685 2020;11:3481.
- 686 [58] Genser N, Seiler J, Kaup A. Camera Array for Multi-Spectral Imaging. *IEEE Trans Image*  
687 *Process.* 2020;29:9234–9249.
- 688 [59] Meyer AF, Poort J, O’Keefe J, Sahani M, Linden JF. A head-mounted camera system  
689 integrates detailed behavioral monitoring with multichannel electrophysiology in freely  
690 moving mice. *Neuron.* 2018;100:46–60.e7.
- 691 [60] Sattler NJ, Wehr M. A Head-Mounted Multi-Camera System for Electrophysiology and  
692 Behavior in Freely-Moving Mice. *Front Neurosci.* 2021;24:592417.
- 693 [61] Chàvez AE, Bozinovic F, Peichl L, Palacios AG. Retinal spectral sensitivity, fur coloration  
694 and urine reflectance in the genus *Octodon* (Rodentia): implications for visual ecology.  
695 *Invest Ophthalmol Vis Sci.* 2003;44:2290–2296.
- 696 [62] Yilmaz M, Meister M. Rapid innate defensive responses of mice to looming visual stimuli.  
697 *Curr Biol.* 2013;23:2011–2015.
- 698 [63] Haverkamp S, Wässle H, Duebel J, Kuner T, Augustine GJ, Feng G, et al. The primordial,  
699 blue-cone color system of the mouse retina. *J Neurosci.* 2005;25:5438–5445.
- 700 [64] Govardovskii VI, Röhlich P, Szél A, Khokhlova TV. Cones in the retina of the Mongolian  
701 gerbil, *Meriones unguiculatus*: an immunocytochemical and electrophysiological study.  
702 *Vision Research.* 1992;32:19–27.
- 703 [65] Jacobs GH, Calderone JB, Fenwick JA, Krogh K, Williams GA. Visual adaptations in a  
704 diurnal rodent, *Octodon degus*. *J Comp Physiol A.* 2003;189:347–361.
- 705 [66] Hogg C, Neveu M, Stokkan KA, Folkow L, Cottrill P, Douglas R, et al. Arctic reindeer  
706 extend their visual range into the ultraviolet. *J Exp Biol.* 2003;214:2014–2019.
- 707 [67] Szél A, Röhlich P, Caffé AR, Van Veen T. Distribution of cone photoreceptors in the  
708 mammalian retina. *Microsc Res Techn.* 1996;35:445–462.

- 709 [68] Wald G. Blue-Blindness in the Normal Fovea. *J Opt Soc Am.* 1967;57:1289–1301.
- 710 [69] Curcio CA, Allen KA, Sloan KR, Lerea CL, Hurley JB, Klock IB, et al. Distribution and  
711 morphology of human cone photoreceptors stained with anti-blue opsin. *J Comp Neurol.*  
712 1991;312:610–624.
- 713 [70] Roorda A, Williams DR. The arrangement of the three cone classes in the living human  
714 eye. *Nature.* 1999;397:520–522.
- 715 [71] Hofer H, Carroll J, Neitz J, Neitz M, Williams DR. Organization of the Human  
716 Trichromatic Cone Mosaic. *J Neurosci.* 2005;25:9669–9679.
- 717 [72] Bleckert A, Schwartz GW, Turner MH, Rieke F, Wong ROL. Visual space is represented  
718 by nonmatching topographies of distinct mouse retinal ganglion cell types. *Curr Biol.*  
719 2014;24:310–315.
- 720 [73] Jacoby J, Schwartz GW. Three Small-Receptive-Field Ganglion Cells in the Mouse Retina  
721 Are Distinctly Tuned to Size, Speed, and Object Motion. *J Neurosci.* 2017;37:610–625.

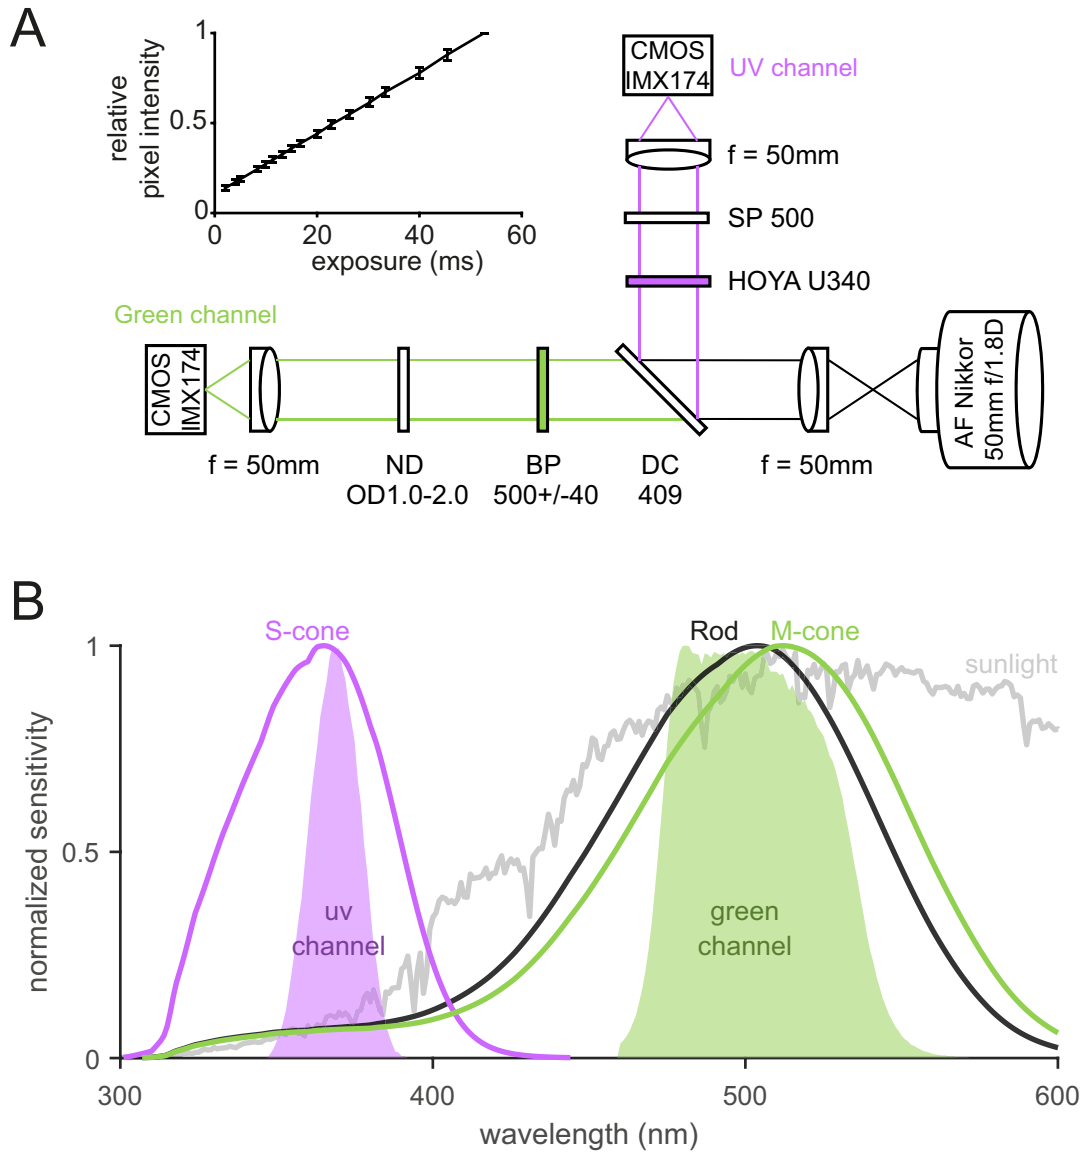

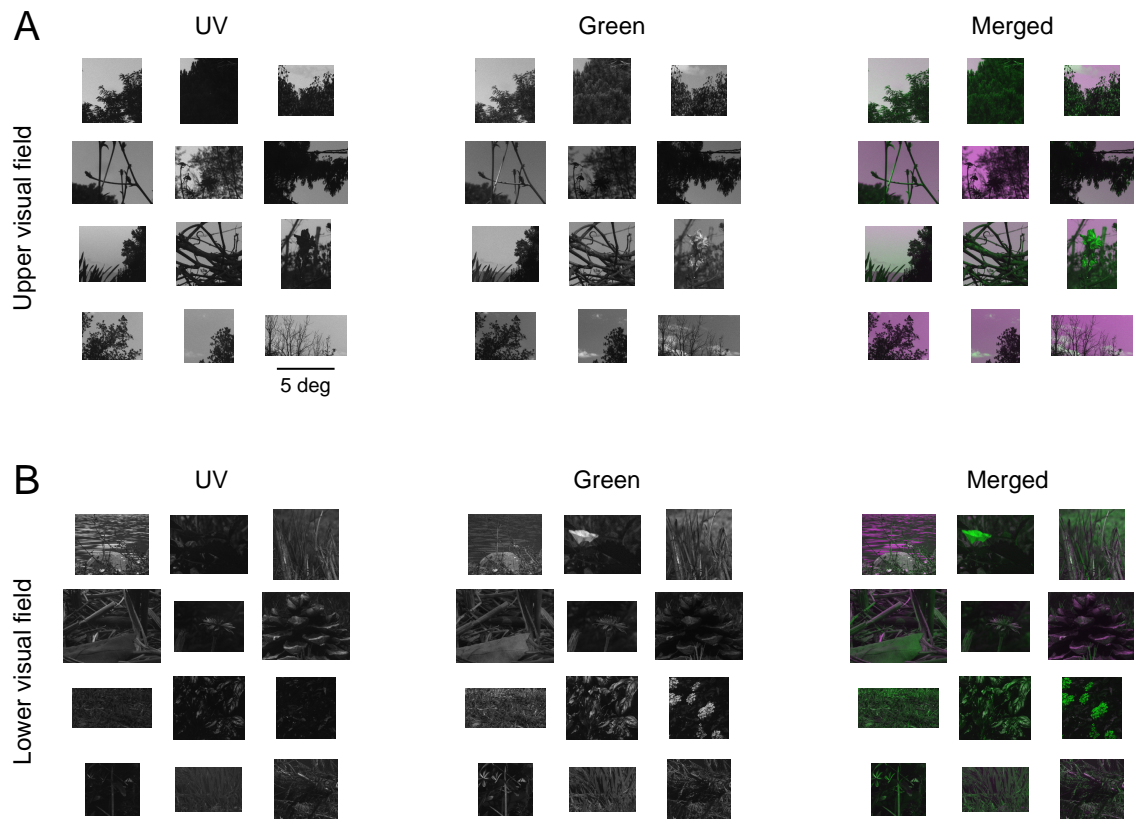



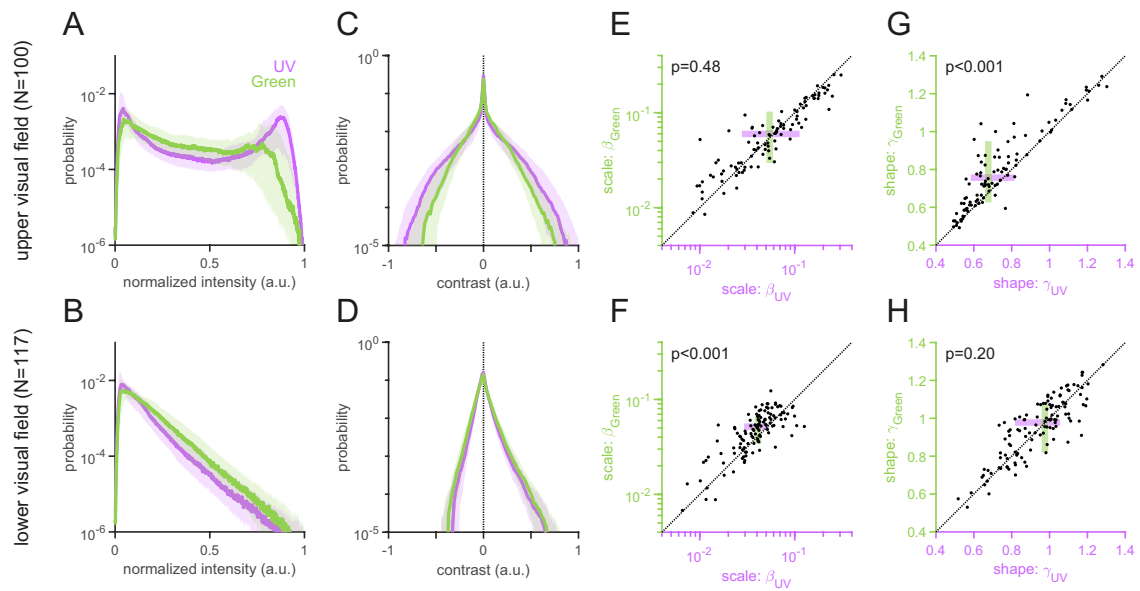

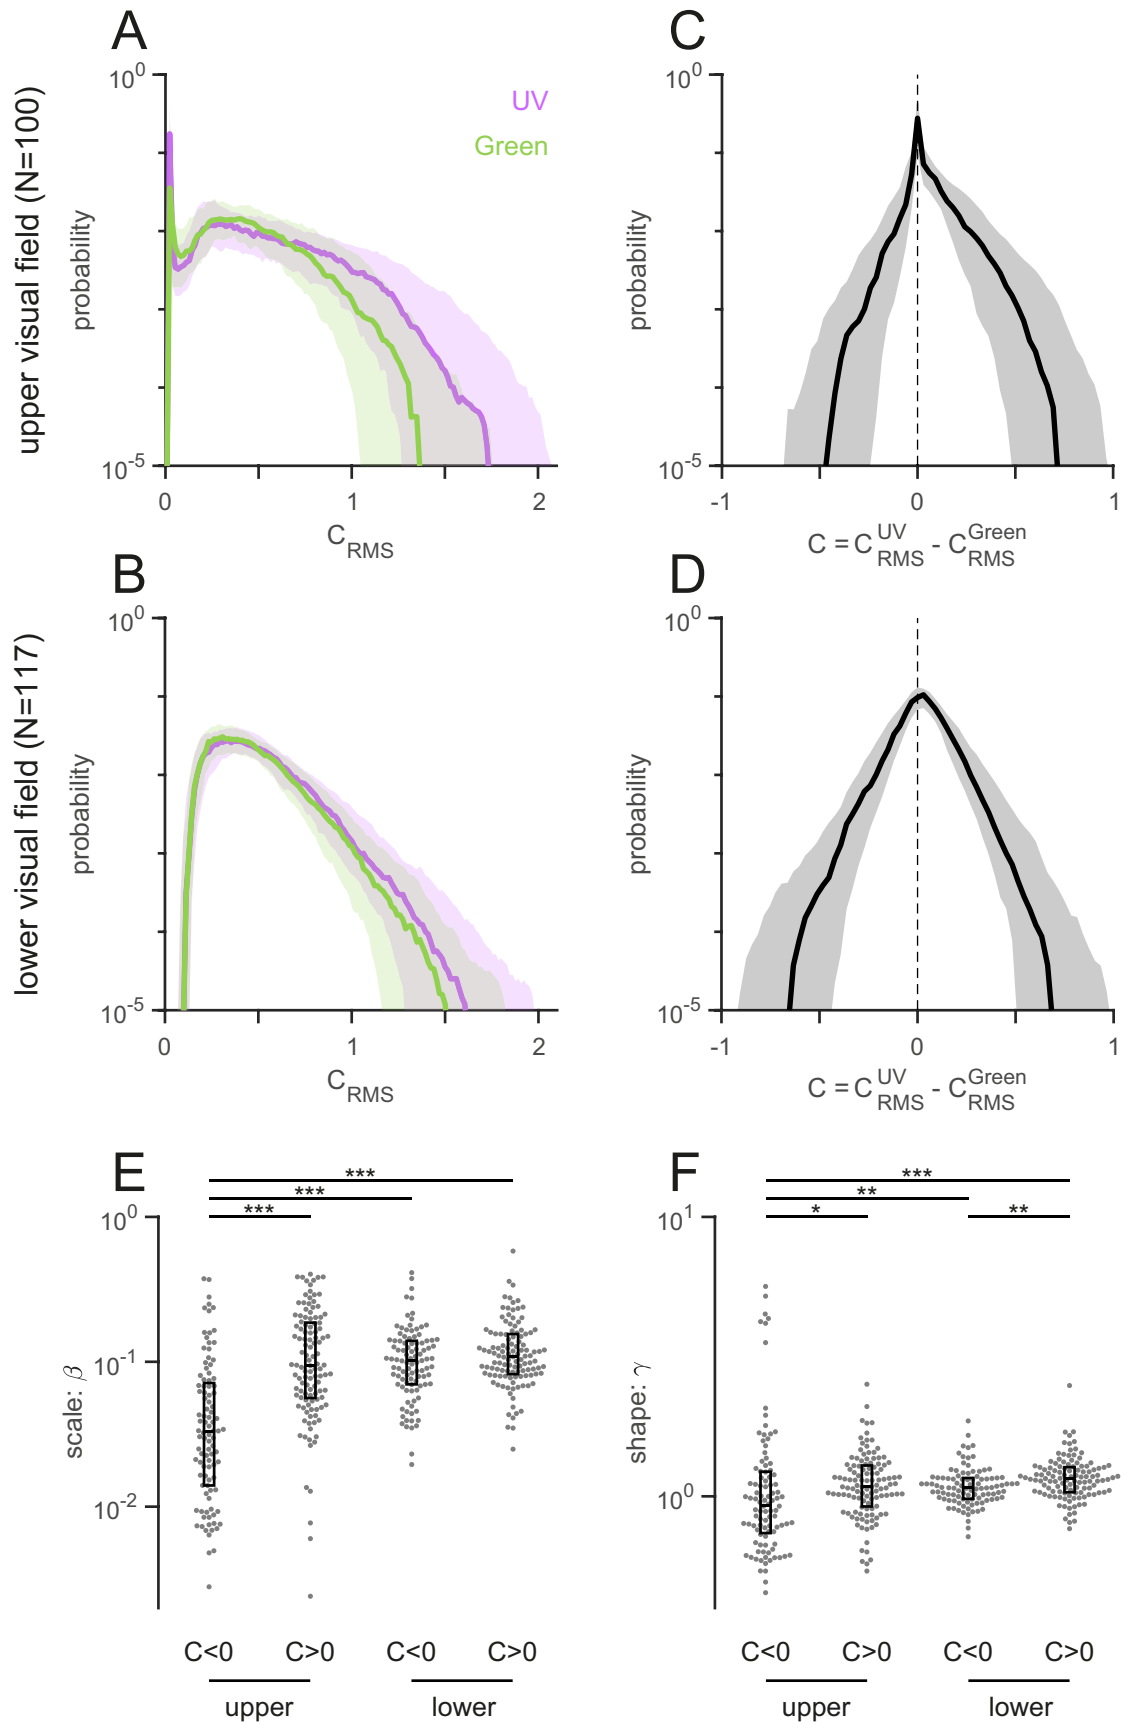

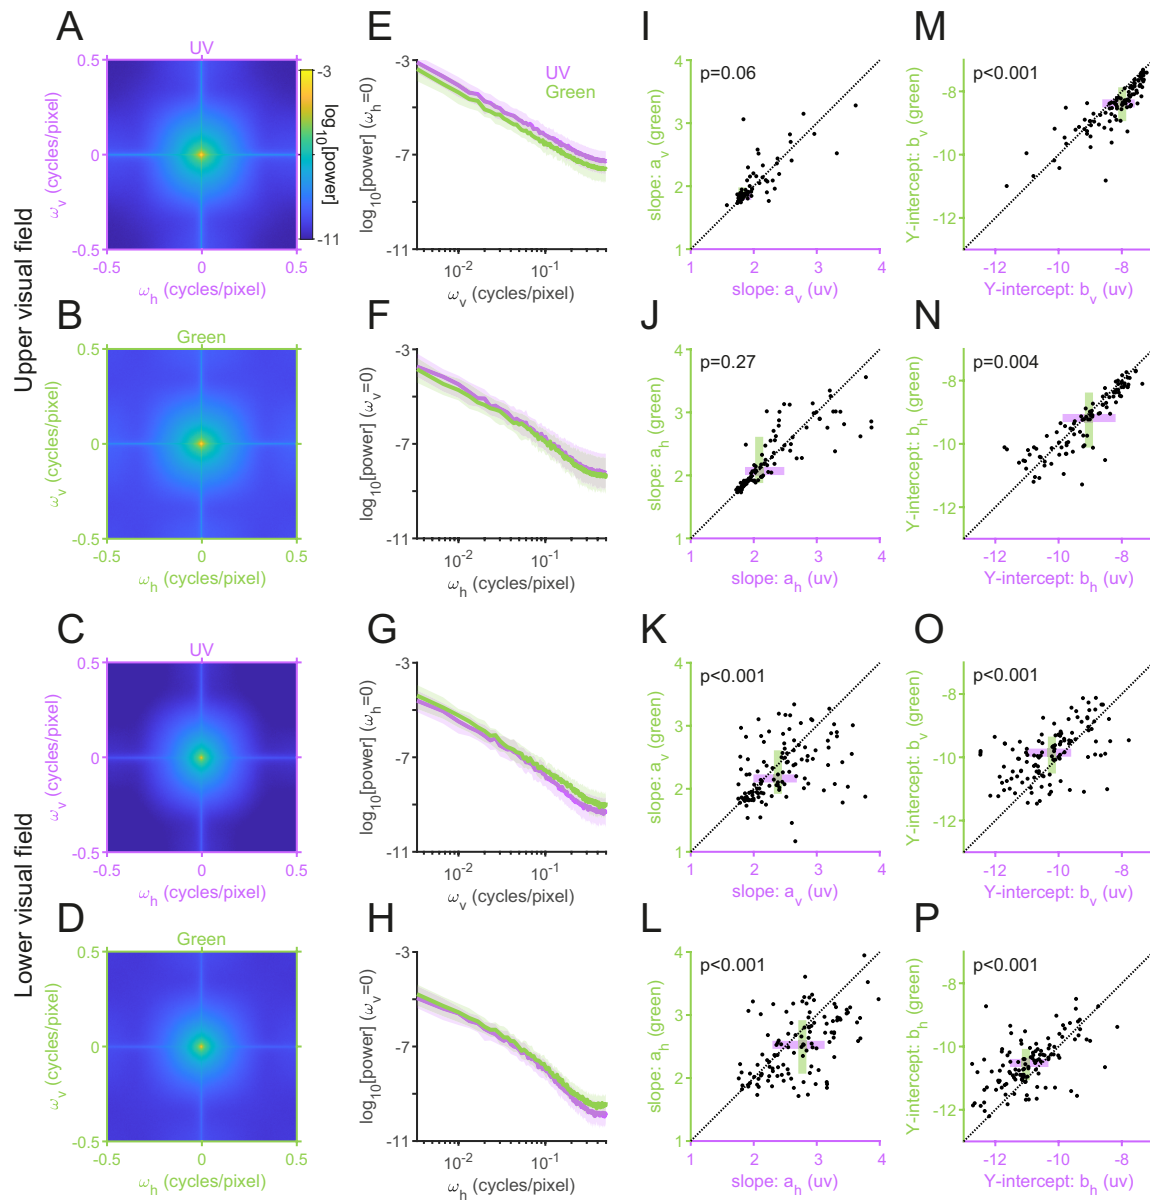

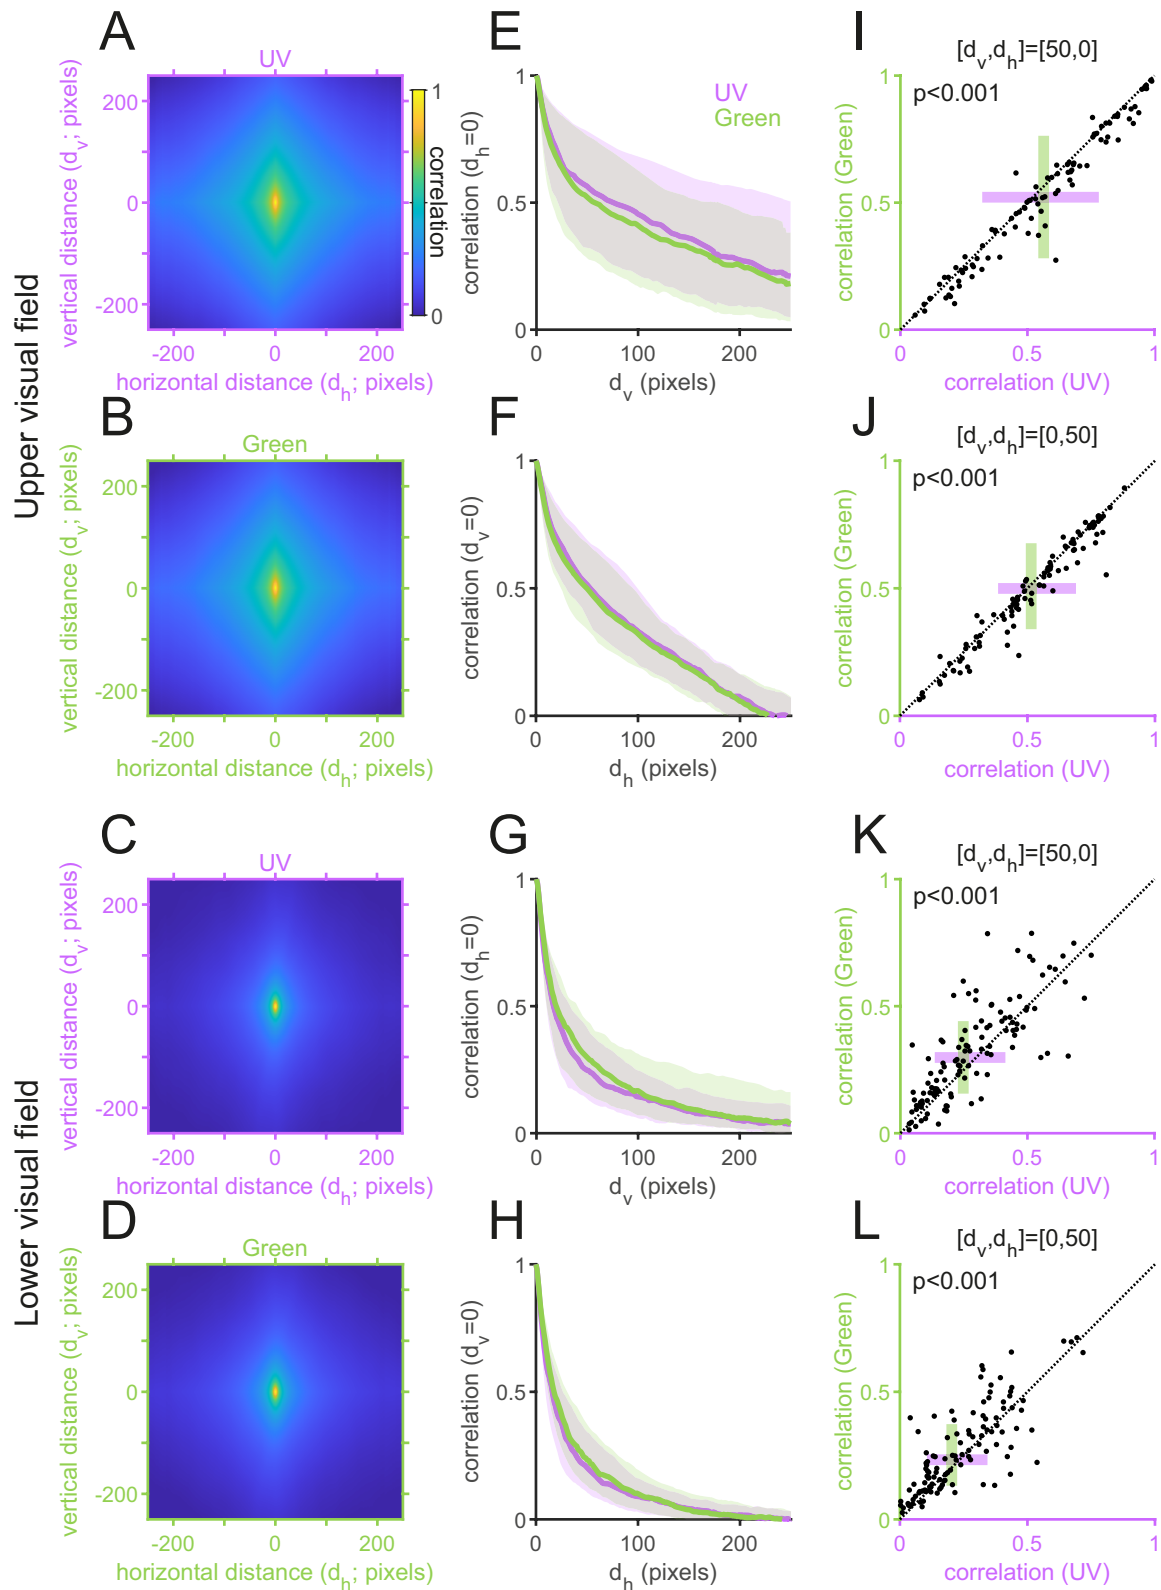

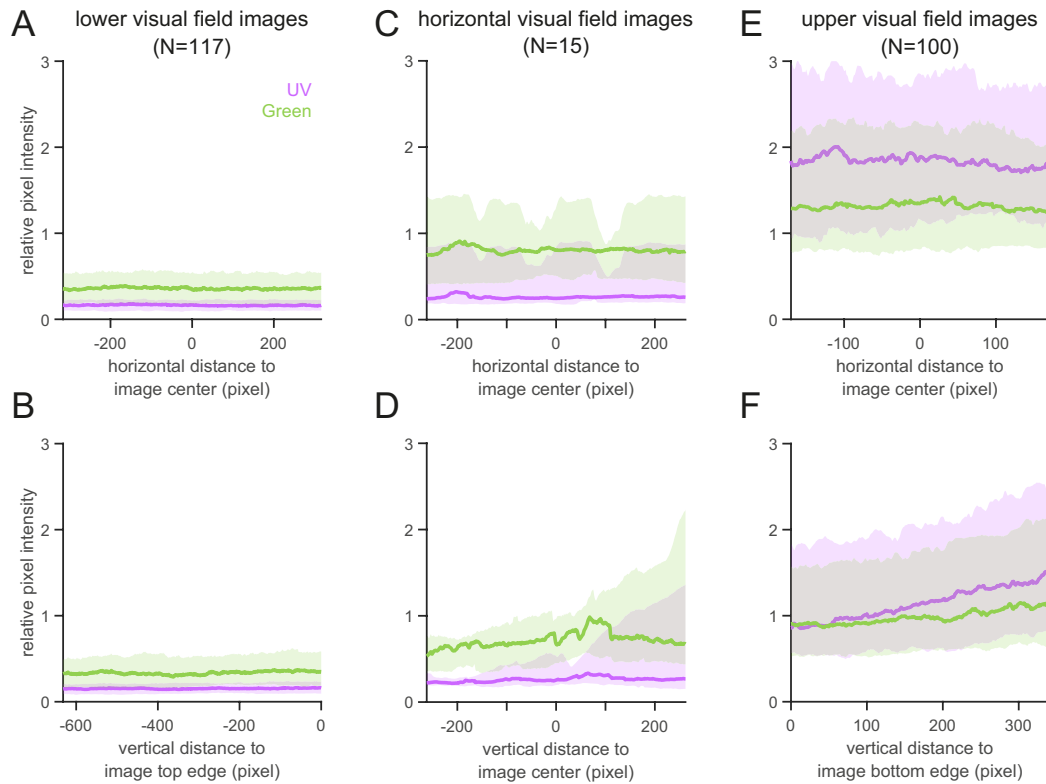

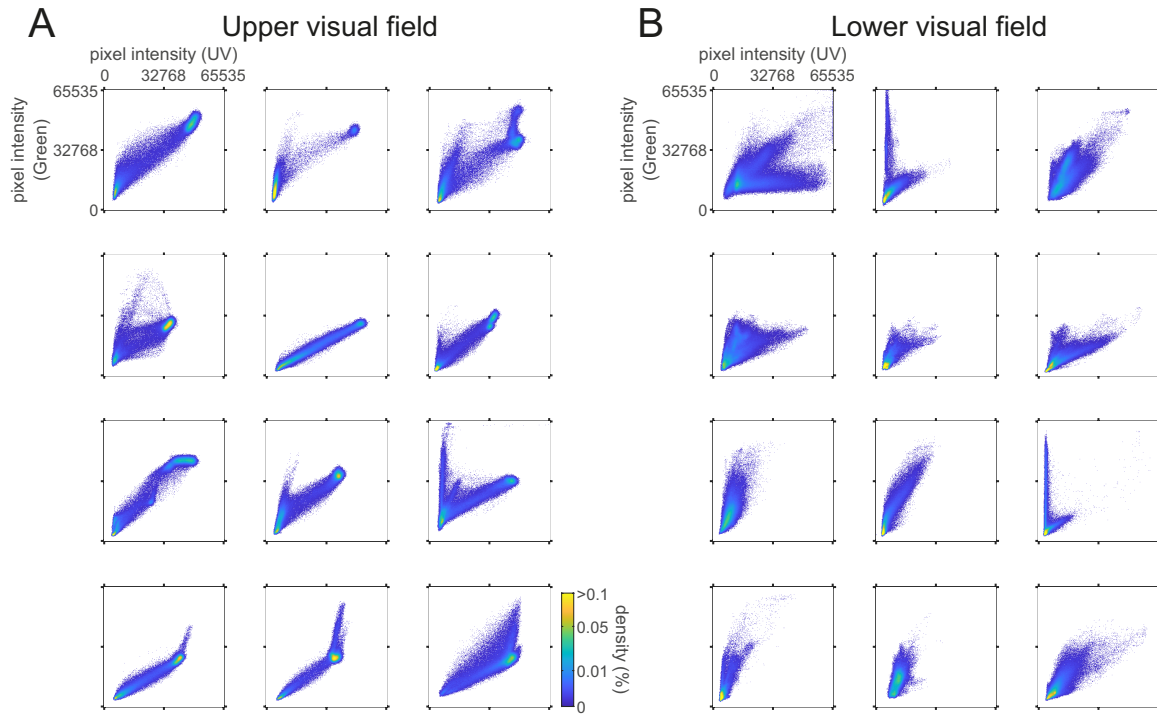

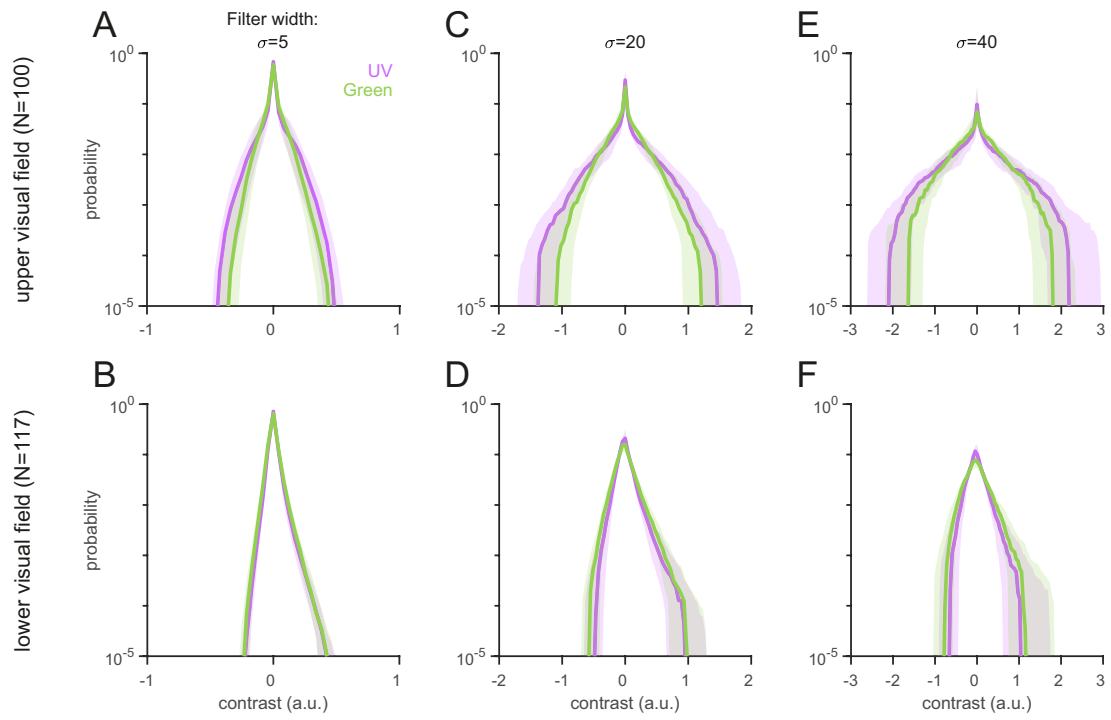

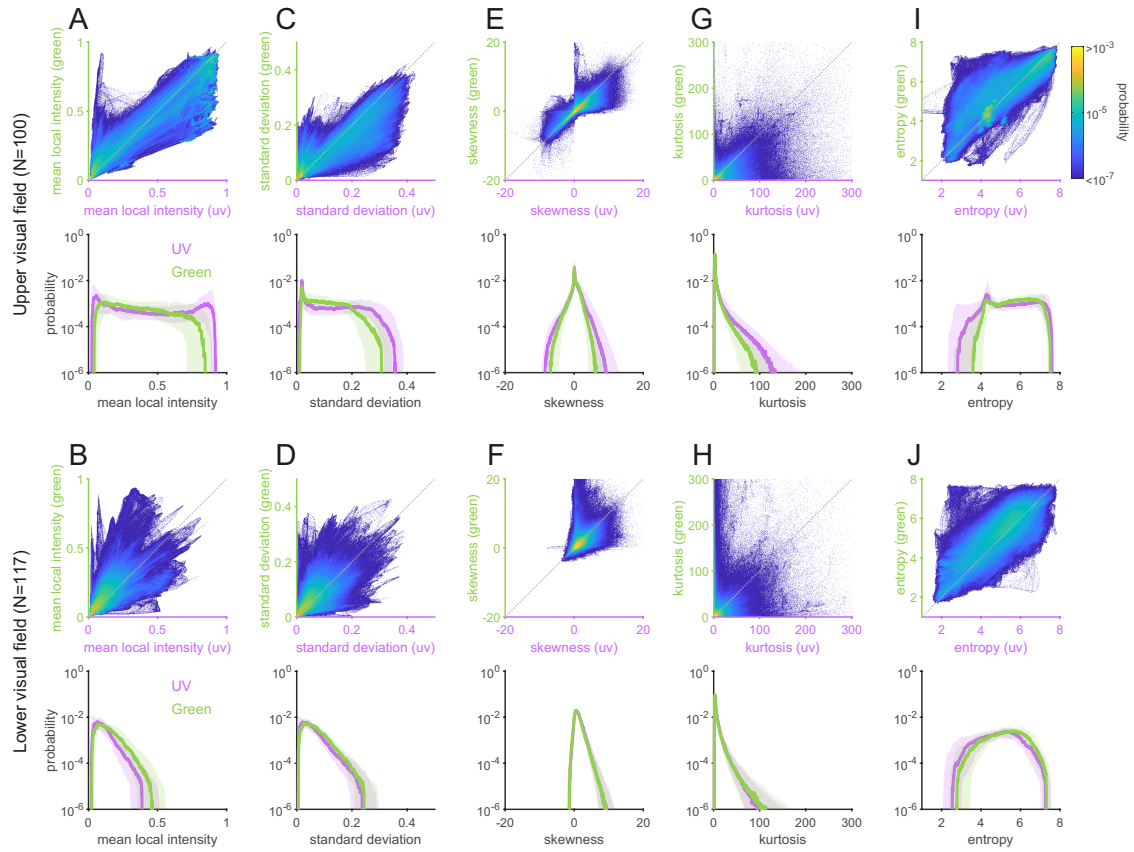

Source: https://www.biorxiv.org/content/10.1101/2021.04.08.438953v4.full.pdf
